# Supplementary material for: Quantum dot (Aun/Agn, n = 3–8) capped single lipids: interactions and physicochemical properties
Source: Royal Society of Chemistry journal article supplement (doi:10.1039/d3cp01131c), 2023-01-01
Supplement: d3cp01131c1.pdf [file d3cp01131c1.pdf]

## Quantum Dot ( $\text{Au}_n/\text{Ag}_n$ , $n = 3-8$ ) Capped Single Lipids: Interactions and Physicochemical Properties

Asma H. Maneri,<sup>a,b</sup>, Shruti Suhas Varode,<sup>a,c</sup> Ashakiran Maibam,<sup>a,b</sup> Priyatosh Ranjan,<sup>c</sup> Sailaja Krishnamurty,<sup>a,b\*</sup> Krati Joshi,<sup>a\*</sup>

<sup>a</sup>Physical Chemistry Division, CSIR-National Chemical Laboratory, Pune 411008, India

<sup>b</sup>Academy of Scientific and Innovative Research (AcSIR), Gaziabad, 201002, India

<sup>c</sup>D. Y. Patil International University, Pune, India

\*electronic-mail: [kp.joshi@ncl.res.in](mailto:kp.joshi@ncl.res.in), [krati.joshi81@gmail.com](mailto:krati.joshi81@gmail.com), [sailaja@ncl.res.in](mailto:sailaja@ncl.res.in),  
[sailaja.raaj@gmail.com](mailto:sailaja.raaj@gmail.com)

### Contents:

**Supplementary Table ST1:** DMPC-Au/Ag cluster interaction energy with different head groups.

**Supplementary Table ST2:** DMPE-Au/Ag cluster interaction energy with different head groups.

**Supplementary Table ST3:** DMPG-Au/Ag cluster interaction energy with different head groups.

**Supplementary Table ST4:** (a) Relative Energies (in kcal/mol) for DMPC/DMPE/DMPG lipid with different conformer of Au cluster. (b) Relative Energies (in kcal/mol) for DMPG with different conformers of Au cluster (single point calculation, 6-311G\*\* for C, H, O, P, Na; RECP19|SD for Au)

**Supplementary Table ST5:** Bond lengths (in Å) for DMPC, DMPE and DMPG with Au Qds (for different sites of interaction).

**Supplementary Table ST6:** DMPC-Au/Ag charge transfer.

**Supplementary Table ST7:** DMPC-Au/Ag: frequency red shift of the P-O bond.

**Supplementary Figure SF1:** Bond length fluctuations and short-time averaged potential energies for  $\text{Ag}_{(5b)}$ -DMPG (ph).

**Supplementary Figure SF2:** Bond length fluctuations and short time averaged potential energies as a function of steps for  $\text{Au}_3$ -DMPE (ch).

Cartesian coordinates of L-Qds-

**Supplementary Table ST1: DMPC- Au/Ag clusters interactions energy (in Kcal/mol)**  
**(For different sites).**

| Cluster | Au      |             |           | Ag      |             |           |
|---------|---------|-------------|-----------|---------|-------------|-----------|
|         | Choline | Carboxylate | Phosphate | Choline | Carboxylate | Phosphate |
| QD3     | 4.83    | -16.06      | -28.74    | 8.97    | -8.91       | -20.14    |
| QD4-a   | -2.07   | -16.38      | -29.87    | -1.69   | -10.48      | -27.23    |
| QD4-b   | -1.63   | -14.37      | -11.61    | -0.88   | -9.29       | -9.35     |
| QD5-a   | -5.84   | NS          | -28.36    | 0.50    | NS          | -16.82    |
| QD5-b   | 5.40    | -17.88      | -32.57    | 11.73   | -9.48       | -21.77    |
| QD5-c   | -2.26   | -8.72       | -21.08    | -0.69   | -5.84       | -10.60    |
| Qd5-d   | NS      | NS          | -28.55    | NS      | NS          | -23.59    |
| QD6-a   | -2.38   | -8.78       | -21.34    | -1.07   | -2.38       | -16.32    |
| QD7-a   | -2.45   | -3.14       | -17.13    | -0.63   | -2.57       | -15.12    |
| QD7-b   | -2.20   | -4.96       | -18.01    | -1.32   | -3.76       | -16.13    |
| QD7-c   | -1.94   | -6.53       | -17.26    | -0.25   | -5.02       | -13.74    |
| QD8-a   | -2.32   | -5.65       | -21.46    | -1.00   | -3.07       | -18.26    |
| QD8-b   | -1.57   | -2.45       | -9.79     | -1.19   | -2.13       | -13.62    |

**Supplementary Table ST2: DMPE- Au/Ag clusters interactions energy (in Kcal/mol)  
(for different sites).**

| Cluster | Au           |             |           | Ag           |             |           |
|---------|--------------|-------------|-----------|--------------|-------------|-----------|
|         | Ethanolamine | Carboxylate | Phosphate | Ethanolamine | Carboxylate | Phosphate |
| QD3     | -0.63        | -13.80      | -20.33    | -0.06        | -7.84       | -13.99    |
| QD4-a   | -3.01        | -15.56      | -21.71    | -2.45        | -10.54      | -15.50    |
| QD4-b   | -0.19        | -11.73      | -6.90     | -0.63        | -9.91       | -5.71     |
| QD5-a   | -1.94        | NS          | -18.70    | -1.00        | NS          | -11.55    |
| QD5-b   | 3.20         | -16.88      | -24.97    | -3.07        | -11.55      | -14.24    |
| QD5-c   | -1.07        | -1.26       | -12.68    | -2.51        | -5.27       | -9.73     |
| Qd5-d   | NS           | NS          | -21.08    | NS           | NS          | -16.38    |
| QD6-a   | -2.32        | -2.20       | -13.36    | -1.32        | -4.52       | -10.54    |
| QD7-a   | -1.57        | -1.26       | -12.61    | 0.19         | -5.08       | -10.48    |
| QD7-b   | -2.57        | -6.02       | -9.22     | -1.32        | -2.95       | -7.09     |
| QD7-c   | -1.69        | -5.52       | -10.10    | -0.25        | -5.02       | -9.10     |
| QD8-a   | -1.44        | -4.83       | -8.60     | -1.00        | -2.38       | -7.72     |
| QD8-b   | -2.51        | -2.89       | -5.65     | -2.07        | -4.89       | -11.11    |

**Supplementary Table ST3: DMPG- Au/Ag clusters interactions energy (in Kcal/mol)  
(for different sites).**

| Cluster | Au       |             |           | Ag       |             |           |
|---------|----------|-------------|-----------|----------|-------------|-----------|
|         | Glycerol | Carboxylate | Phosphate | Glycerol | Carboxylate | Phosphate |
| QD3     | 5.33     | -14.50      | -34.58    | 7.09     | -10.04      | -23.53    |
| QD4-a   | -22.34   | -15.31      | -40.35    | -9.98    | -10.79      | -30.62    |
| QD4-b   | -3.70    | -12.05      | -9.41     | -9.91    | -11.11      | 0.75      |
| QD5-a   | 1.76     | NS          | -27.42    | 1.63     | NS          | -16.75    |
| QD5-b   | 3.26     | -18.51      | -43.42    | 10.98    | -11.86      | -31.38    |
| QD5-c   | -4.27    | -9.54       | -17.38    | -2.45    | -6.71       | -10.92    |
| Qd5-d   | NS       | NS          | NS        | NS       | NS          | -26.67    |
| QD6-a   | -1.69    | -2.32       | -22.90    | -4.64    | -2.76       | -15.37    |
| QD7-a   | -3.32    | -2.51       | -10.73    | -1.94    | -1.51       | -8.34     |
| QD7-b   | -2.26    | NS          | NS        | -5.52    | -1.38       | -16.75    |
| QD7-c   | -0.88    | -6.59       | -8.66     | -5.08    | -5.71       | -17.38    |
| QD8-a   | -3.01    | -5.52       | -15.37    | -1.07    | -4.02       | -11.36    |
| QD8-b   | -7.40    | -2.89       | -22.72    | -6.53    | -4.77       | -16.69    |

**Supplementary Table ST4: (a) Relative Energies (in kcal/mol) for DMPC/DMPE/DMPG lipid with different conformer of Au cluster**

| Cluster | Cluster-Shape | DMPC    |         |         | DMPE    |         |         | DMPG    |         |         |
|---------|---------------|---------|---------|---------|---------|---------|---------|---------|---------|---------|
|         |               | Ch      | Ca      | Ph      | Ch      | Ca      | Ph      | Ch      | Ca      | Ph      |
| Au4a    | Pendate       | 0.0     | 0.0     | 0.0     | 0.0     | 0.0     | 0.0     | 0.0     | 0.0     | 0.0     |
| Au4b    | Planar        | 1.6943  | 3.2630  | 19.5155 | 4.0788  | 5.0828  | 16.0642 | 19.8920 | 4.5181  | 32.1912 |
| Au5a    | Linear        | 15.6250 | NS      | 11.9227 | 18.3233 | NS      | 13.1777 | 25.2259 | NS      | 15.2485 |
| Au5b    | Pendate       | 27.6104 | 10.7932 | 8.4714  | 24.2218 | 4.3298  | 7.6556  | 27.4849 | 10.9814 | 0.0     |
| Au5c    | Planar        | 0.0     | 0.0     | 0.0     | 0.0     | 0.0     | 0.0     | 0.0     | 0.0     | 6.0868  |
| Au5d    | TBP           | NS      | NS      | 14.9347 | NS      | NS      | 13.9934 | NS      | NS      | NS      |
| Au7a    | Planar        | 0.0     | 0.0     | 0.0     | 0.0     | 0.0     | 0.0     | 0.0     | 0.0     | 0.0     |
| Au7b    | PBP           | 17.3820 | 15.3112 | 16.2525 | 16.1270 | 12.3619 | 20.5195 | 18.1978 | NS      | NS      |
| Au7c    | Bicapped-TBP  | 16.3152 | 12.4247 | 15.6877 | 15.6877 | 11.5462 | 18.3233 | 18.2605 | 11.7344 | 17.8840 |
| Au8a    | Planar        | 0.0     | 0.0     | 0.0     | 0.0     | 0.0     | 0.0     | 0.0     | 0.0     | 1.3805  |
| Au8b    | Bicapped-Oh   | 6.7143  | 9.1616  | 17.6330 | 4.8946  | 7.9066  | 0.0142  | 1.5688  | 8.5969  | 0.0     |

**(b) Relative Energies (in kcal/mol) for DMPG with different conformers of Au cluster (single point calculation, 6-311G\*\* for C, H, O, P, Na; RECP19|SD for Au)**

| DMPG-Au cluster | Relative Energy (Kcal/mol) |
|-----------------|----------------------------|
| DMPG-Au4a-Ca    | 0.0                        |
| DMPG-Au4b-Ca    | 4.4553                     |
| DMPG-Au8a-Ch    | 0.0                        |
| DMPG-Au8b-Ch    | 0.8157                     |

**Supplementary Table ST5:** Bond lengths (in Å) for DMPC, DMPE and DMPG with Au Qds (for different sites of interaction).

| Gold-Cluster | DMPC    |             |           | DMPE    |             |           | DMPG    |             |           |
|--------------|---------|-------------|-----------|---------|-------------|-----------|---------|-------------|-----------|
|              | Choline | Carboxylate | Phosphate | Choline | Carboxylate | Phosphate | Choline | Carboxylate | Phosphate |
| Au3          | 2.257   | 2.283       | 2.217     | 2.359   | 2.323       | 2.265     | 2.381   | 2.311       | 2.176     |
| Au4a         | 3.479   | 2.264       | 2.201     | 2.756   | 2.284       | 2.258     | 2.362   | 2.279       | 2.163     |
| Au4b         | 2.743   | 2.296       | 2.348     | 2.348   | 2.322       | 2.428     | 2.412   | 2.319       | 2.35      |
| Au5a         | 2.992   |             | 2.207     | 2.684   |             | 2.274     | 2.35    |             | 2.181     |
| Au5b         | 2.35    | 2.257       | 2.204     | 2.35    | 2.273       | 2.249     | 2.745   | 2.265       | 2.155     |
| Au5c         | 3.229   | 2.414       | 2.275     | 2.43    | 3.037       | 2.358     | 2.579   | 2.426       | 2.233     |
| Au5d         |         |             | 2.226     |         |             | 2.259     |         |             |           |
| Au6a         | 3.424   | 2.424       | 2.257     | 3.141   | 2.898       | 2.348     | 3.613   | 2.912       | 2.238     |
| Au7a         | 3.083   | 2.79        | 2.47      | 2.436   | 2.752       | 2.337     | 3.059   | 2.884       | 2.368     |
| Au7b         | 3.003   | 2.497       | 2.325     | 2.386   | NS          | 2.378     | 2.699   |             |           |
| Au7c         | 3.432   | 2.531       | 2.297     | 2.41    | 2.511       | 2.409     | 2.422   | 2.5         | 2.354     |
| Au8a         | 3.228   | 2.595       | 2.418     | 2.426   | 2.628       | 2.444     | 2.984   | 2.612       | 2.335     |
| Au8b         | 3.152   | 2.757       | 2.353     | 2.503   | 2.966       | 2.356     | 2.649   | 2.93        | 2.247     |

**Supplementary Table ST6: DMPC - Au/Ag charge transfer.**

| Cluster | Au      |             |           | Ag      |             |           |
|---------|---------|-------------|-----------|---------|-------------|-----------|
|         | Choline | Carboxylate | Phosphate | Choline | Carboxylate | Phosphate |
| Qd3     | -0.1727 | -0.3131     | -0.422    | -0.159  | -0.3586     | -0.4687   |
| Qd4-a   | -0.1833 |             | -0.4653   | -0.1717 |             | -0.507    |
| Qd4-b   | -0.0547 | -0.369      | -0.4766   | -0.0576 | -0.4214     | -0.6031   |
| Qd4-c   | -0.1203 | -0.3431     | -0.4547   | -0.0801 | -0.3858     | -0.501    |
| Qd5-a   | -0.1022 |             | -0.4755   | -0.1104 |             | -0.5108   |
| Qd5-b   | -0.0463 | -0.4006     | -0.4847   | -0.1398 | -0.4408     | -0.5435   |
| Qd5-c   | -0.1032 | -0.107      | -0.4756   | -0.0849 | -0.1131     | -0.5145   |
| Qd5-d   |         |             | -0.5311   |         |             | -0.5892   |
| Qd6-c   | -0.0832 | -0.3121     | -0.432    | -0.0801 | -0.3426     | -0.475    |
| Qd6-e   | -0.195  | -0.3885     | -0.4729   | -0.1889 | -0.4368     | -0.5128   |
| Qd7-c   | -0.0857 | -0.3225     | -0.4308   | -0.0958 | -0.422      | -0.48     |
| Qd7-d   | -0.082  | -0.2641     | -0.4616   | -0.0816 | -0.3644     | -0.4926   |
| Qd7-f   | -0.061  | -0.3394     | -0.453    | -0.0626 | -0.3812     | -0.501    |
| Qd8-c   | -0.0719 | -0.3532     | -0.4649   | -0.0489 | -0.3883     | -0.5169   |
| Qd8-f   | -0.0969 | -0.3753     | -0.4493   | -0.0829 | -0.3784     | -0.4932   |

**Supplementary Table ST7: PO<sub>2</sub><sup>-</sup> stretching frequencies for Qd-Lipid complexes.**

| Au <sub>n</sub>  | PO <sub>2</sub> <sup>-</sup> Stretching Frequency (cm <sup>-1</sup> ) |       |        | Ag <sub>n</sub>  | PO <sub>2</sub> <sup>-</sup> Stretching Frequency (cm <sup>-1</sup> ) |       |        |
|------------------|-----------------------------------------------------------------------|-------|--------|------------------|-----------------------------------------------------------------------|-------|--------|
|                  | DMPC                                                                  | DMPE  | DMPG   |                  | DMPC                                                                  | DMPE  | DMPG   |
| Au <sub>3</sub>  | 1008.8                                                                | 952.4 | 979.1  | Ag <sub>3</sub>  | 1031.2                                                                | 943.2 | 1013.7 |
| Au <sub>4b</sub> | 985.2                                                                 | 965.5 | 968.2  | Ag <sub>4b</sub> | 1012.8                                                                | 944.2 | 1012.6 |
| Au <sub>4c</sub> | 1018.0                                                                | 937.2 | 996.2  | Ag <sub>4c</sub> | 1024.2                                                                | 937.9 | 987.6  |
| Au <sub>5a</sub> | 990.3                                                                 | 950.3 | 965.8  | Ag <sub>5a</sub> | 1018.8                                                                | 941.0 | 1004.2 |
| Au <sub>5b</sub> | 1010.2                                                                | 966.7 | 973.2  | Ag <sub>5b</sub> | 1029.3                                                                | 945.0 | 1015.0 |
| Au <sub>5c</sub> | 999.6                                                                 | 946.6 | 999.5  | Ag <sub>5c</sub> | 1026.6                                                                | 941.7 | 1012.4 |
| Au <sub>5d</sub> | 995.6                                                                 | 956.7 |        | Ag <sub>5d</sub> | 1028.8                                                                | 950.5 | 1011.9 |
| Au <sub>6c</sub> | 1003.8                                                                | 951.1 | 975.8  | Ag <sub>6c</sub> | 1021.3                                                                | 946.2 | 1009.0 |
| Au <sub>7c</sub> | 987.9                                                                 | 951.8 | 1013.4 | Ag <sub>7c</sub> | 1025.5                                                                | 939.3 | 1020.1 |
| Au <sub>7d</sub> | 1002.8                                                                | 940.8 |        | Ag <sub>7d</sub> | 1023.7                                                                | 933.5 | 1010.3 |
| Au <sub>7f</sub> | 998.9                                                                 | 941.0 | 1009.2 | Ag <sub>7f</sub> | 1020.5                                                                | 938.4 | 1008.7 |
| Au <sub>8c</sub> | 991.7                                                                 | 938.2 | 992.7  | Ag <sub>8c</sub> | 1001.2                                                                | 938.2 | 1011.1 |
| Au <sub>8d</sub> | 1016.9                                                                | 946.2 | 980.0  | Ag <sub>8d</sub> | 1024.3                                                                | 936.2 | 1013.9 |



**Supplementary Figure SF1:** Bond length fluctuations and short-time averaged potential energies for  $\text{Ag}_{5b}$ -DMPG (ph).

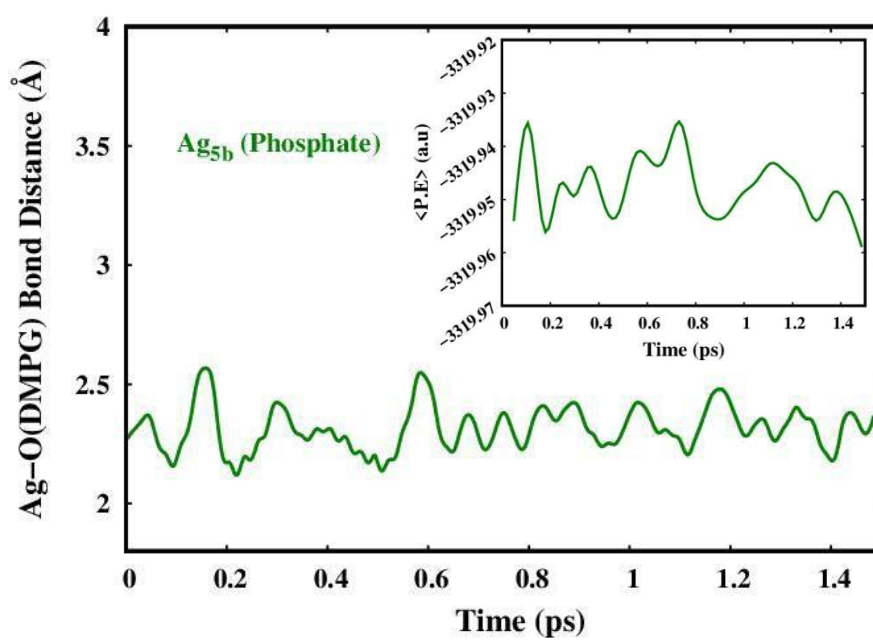

**Supplementary Figure SF2:** Bond length fluctuations and short time averaged potential energies as a function of steps for Au<sub>3</sub>-DMPE (ch).

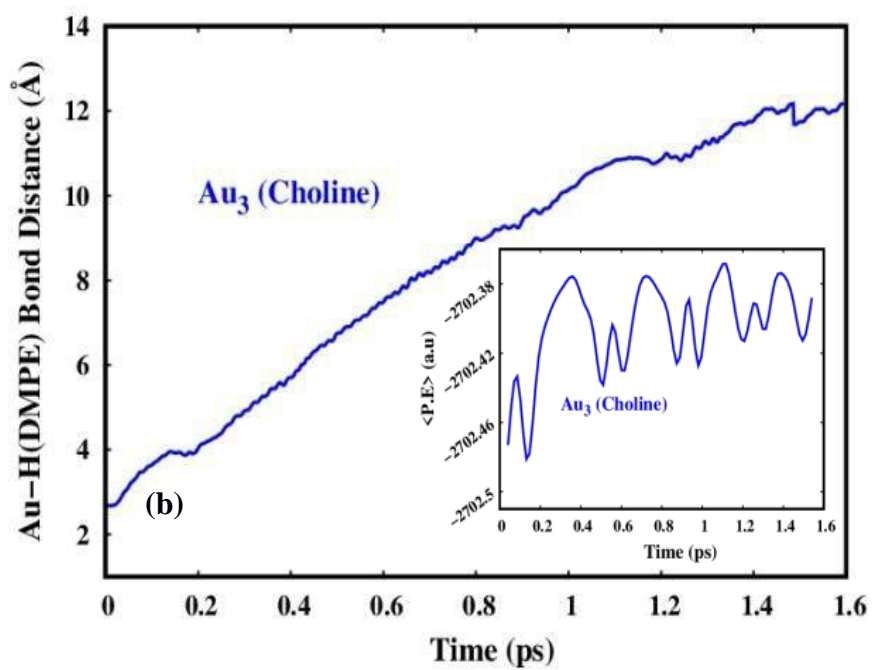

Cartesian coordinates of selected Qd-Lipid complexes:

### 1) Phosphate site

a) Au<sub>5b</sub>-DMPG

117

|   |            |           |            |
|---|------------|-----------|------------|
| C | -1.739546  | -3.315406 | -31.053960 |
| C | -2.103940  | -3.250030 | -29.553571 |
| C | -3.627493  | -3.287258 | -29.290733 |
| C | -4.001125  | -3.230015 | -27.790801 |
| C | -5.526705  | -3.272206 | -27.534927 |
| C | -5.908959  | -3.224062 | -26.036464 |
| C | -7.435768  | -3.261593 | -25.789971 |
| C | -7.826087  | -3.218827 | -24.292549 |
| C | -9.356932  | -3.222972 | -24.059557 |
| C | -9.769377  | -3.180358 | -22.567126 |
| C | -11.304085 | -3.136667 | -22.364250 |
| C | -11.735513 | -3.134876 | -20.878607 |
| C | -13.278210 | -3.075161 | -20.719343 |
| C | -13.739122 | -3.208006 | -19.268080 |
| O | -13.197284 | -2.679728 | -18.295865 |
| O | -14.860602 | -4.007670 | -19.195987 |
| C | -15.347582 | -4.416841 | -17.871660 |
| C | -15.085261 | -5.934971 | -17.717657 |
| O | -13.691177 | -6.228977 | -18.030538 |
| C | -13.455198 | -6.932958 | -19.201079 |
| O | -14.340720 | -7.399114 | -19.913226 |
| C | -16.860717 | -4.155616 | -17.793456 |
| O | -17.209364 | -2.778780 | -17.446991 |
| P | -17.351908 | -2.344829 | -15.862503 |
| O | -18.213752 | -1.095483 | -15.807880 |
| O | -15.805624 | -2.050817 | -15.360903 |
| C | -15.081286 | -0.911101 | -15.936038 |
| C | -14.547557 | 0.000553  | -14.808605 |
| O | -13.571680 | 0.924399  | -15.352618 |
| C | -15.593440 | 0.930382  | -14.146036 |
| O | -16.578080 | 0.241557  | -13.321176 |
| O | -17.732216 | -3.624995 | -15.056861 |
| C | -11.956621 | -7.048469 | -19.461856 |
| C | -11.616955 | -7.103317 | -20.969899 |
| C | -10.095410 | -7.154245 | -21.229882 |
| C | -9.740128  | -7.175446 | -22.734863 |
| C | -8.217595  | -7.170162 | -23.000849 |
| C | -7.850720  | -7.197082 | -24.502149 |
| C | -6.326078  | -7.160544 | -24.757311 |
| C | -5.948688  | -7.205014 | -26.255653 |
| C | -4.424082  | -7.161825 | -26.508304 |
| C | -4.048656  | -7.214283 | -28.007273 |
| C | -2.525362  | -7.161755 | -28.268715 |
| C | -2.155166  | -7.209811 | -29.769958 |

|    |            |           |            |
|----|------------|-----------|------------|
| C  | -0.633632  | -7.128382 | -30.029883 |
| Na | -18.825198 | 0.022741  | -13.980687 |
| H  | -15.053562 | 1.685578  | -13.547354 |
| H  | -0.646316  | -3.288748 | -31.202324 |
| H  | -0.408443  | -7.171740 | -31.109676 |
| H  | -14.803034 | -3.850922 | -17.104902 |
| H  | -15.734063 | -6.527364 | -18.378848 |
| H  | -15.242823 | -6.224084 | -16.667788 |
| H  | -13.768511 | -3.860764 | -21.314424 |
| H  | -11.446281 | -6.208490 | -18.964059 |
| H  | -17.313292 | -4.332994 | -18.780082 |
| H  | -15.721061 | -0.336911 | -16.626629 |
| H  | -14.089120 | -0.644385 | -14.028706 |
| H  | -12.112383 | -7.978011 | -21.422470 |
| H  | -17.309524 | -4.840158 | -17.056909 |
| H  | -11.282022 | -2.281303 | -20.347659 |
| H  | -2.175957  | -2.465248 | -31.607541 |
| H  | -0.100399  | -7.962778 | -29.540197 |
| H  | -2.118639  | -4.244486 | -31.514724 |
| H  | -0.213311  | -6.185659 | -29.636640 |
| H  | -14.233677 | -1.332190 | -16.502884 |
| H  | -12.044483 | -6.215203 | -21.468943 |
| H  | -11.352512 | -4.046154 | -20.385447 |
| H  | -11.608231 | -7.971082 | -18.960441 |
| H  | -13.653189 | -2.104671 | -21.093745 |
| H  | -2.554728  | -8.141349 | -30.213053 |
| H  | -1.682077  | -2.327811 | -29.111928 |
| H  | -1.624968  | -4.094014 | -29.023804 |
| H  | -2.659935  | -6.376653 | -30.293209 |
| H  | -5.434132  | -4.074859 | -25.513008 |
| H  | -6.427664  | -6.354902 | -26.776536 |
| H  | -5.942987  | -4.192629 | -27.987123 |
| H  | -10.194688 | -8.067314 | -23.206026 |
| H  | -4.006702  | -6.240467 | -26.059139 |
| H  | -9.357080  | -4.067104 | -22.049754 |
| H  | -9.793563  | -4.125783 | -24.529118 |
| H  | -8.326660  | -6.336250 | -25.008954 |
| H  | -4.536021  | -6.370670 | -28.531679 |
| H  | -3.518876  | -4.075481 | -27.264728 |
| H  | -7.373033  | -4.084420 | -23.772601 |
| H  | -10.198735 | -6.297158 | -23.227381 |
| H  | -8.278548  | -8.105820 | -24.967084 |
| H  | -6.367975  | -8.122343 | -26.710880 |
| H  | -7.772532  | -6.270832 | -22.533015 |
| H  | -7.855871  | -4.176232 | -26.250450 |
| H  | -5.487720  | -2.307194 | -25.581689 |
| H  | -9.309842  | -2.298123 | -22.082479 |
| H  | -4.049333  | -4.208417 | -29.736701 |
| H  | -7.755034  | -8.040285 | -22.496628 |
| H  | -9.804064  | -2.355785 | -24.582684 |
| H  | -2.110733  | -6.237250 | -27.821987 |
| H  | -5.904739  | -6.243473 | -24.302036 |

|    |            |           |            |
|----|------------|-----------|------------|
| H  | -7.389081  | -2.313522 | -23.828732 |
| H  | -4.463951  | -8.137885 | -28.454253 |
| H  | -3.941527  | -8.006186 | -25.980013 |
| H  | -6.006864  | -2.425347 | -28.062195 |
| H  | -3.580572  | -2.308197 | -27.344760 |
| H  | -11.758259 | -4.007876 | -22.873951 |
| H  | -9.665441  | -8.048076 | -20.737839 |
| H  | -5.848322  | -8.011907 | -24.234904 |
| H  | -7.908853  | -2.408978 | -26.313873 |
| H  | -4.109146  | -2.442080 | -29.819254 |
| H  | -2.033402  | -8.004583 | -27.745128 |
| H  | -11.712252 | -2.239153 | -22.867043 |
| H  | -9.611636  | -6.277767 | -20.756069 |
| H  | -12.907820 | 0.408626  | -15.853927 |
| H  | -16.170840 | 1.453671  | -14.924414 |
| H  | -16.112580 | -0.230815 | -12.602668 |
| Au | -19.293291 | -3.752446 | -13.576648 |
| Au | -20.876789 | -1.931349 | -12.067815 |
| Au | -21.049841 | 0.746422  | -12.072680 |
| Au | -21.087460 | -4.644417 | -11.805982 |
| Au | -19.674873 | 2.964874  | -12.687956 |

b) Au<sub>8b</sub> - DMPE

117

|   |            |           |            |
|---|------------|-----------|------------|
| C | -1.569707  | -3.566362 | -31.201939 |
| C | -1.933056  | -3.482216 | -29.701990 |
| C | -3.458017  | -3.479628 | -29.445319 |
| C | -3.838668  | -3.411491 | -27.948342 |
| C | -5.365350  | -3.414407 | -27.702511 |
| C | -5.753190  | -3.357807 | -26.206212 |
| C | -7.282251  | -3.362984 | -25.972131 |
| C | -7.686947  | -3.306497 | -24.480617 |
| C | -9.217818  | -3.294098 | -24.259846 |
| C | -9.625865  | -3.236586 | -22.769229 |
| C | -11.157469 | -3.212304 | -22.553062 |
| C | -11.561686 | -3.221952 | -21.061226 |
| C | -13.098007 | -3.213592 | -20.871112 |
| C | -13.519158 | -3.354329 | -19.410225 |
| O | -12.876597 | -2.948491 | -18.442083 |
| O | -14.731849 | -4.007086 | -19.322331 |
| C | -15.234202 | -4.380299 | -17.991419 |
| C | -15.254264 | -5.923432 | -17.923513 |
| O | -13.895128 | -6.405666 | -18.153436 |
| C | -13.634769 | -6.978709 | -19.388914 |
| O | -14.502547 | -7.273926 | -20.204632 |
| C | -16.640704 | -3.790609 | -17.814338 |
| O | -16.597811 | -2.362166 | -17.491142 |
| P | -16.531196 | -1.925627 | -15.912468 |
| O | -16.939435 | -0.387955 | -16.033998 |
| O | -14.946193 | -1.955652 | -15.481150 |

|   |            |           |            |
|---|------------|-----------|------------|
| C | -13.997865 | -0.981119 | -16.054184 |
| C | -13.708013 | 0.118369  | -15.017218 |
| N | -14.957222 | 0.872900  | -14.633234 |
| O | -17.303861 | -2.846430 | -14.992115 |
| C | -12.131524 | -7.169941 | -19.577314 |
| C | -11.726003 | -7.184563 | -21.068975 |
| C | -10.196053 | -7.221145 | -21.277509 |
| C | -9.803392  | -7.236575 | -22.773192 |
| C | -8.276632  | -7.233915 | -23.015869 |
| C | -7.897585  | -7.269941 | -24.515156 |
| C | -6.372443  | -7.262088 | -24.769163 |
| C | -5.994833  | -7.320788 | -26.268259 |
| C | -4.468055  | -7.314361 | -26.518121 |
| C | -4.085493  | -7.377870 | -28.015888 |
| C | -2.558915  | -7.364372 | -28.267579 |
| C | -2.175567  | -7.425123 | -29.765357 |
| C | -0.649851  | -7.397834 | -30.013443 |
| H | -16.291812 | 0.197955  | -15.482420 |
| H | -14.835300 | 1.881470  | -14.780981 |
| H | -15.158323 | 0.741333  | -13.634771 |
| H | -0.476343  | -3.568123 | -31.350208 |
| H | -0.420595  | -7.441610 | -31.092244 |
| H | -14.546809 | -3.981359 | -17.232644 |
| H | -15.933706 | -6.362933 | -18.668571 |
| H | -15.536430 | -6.246306 | -16.910355 |
| H | -13.574327 | -4.019247 | -21.451871 |
| H | -11.607997 | -6.371696 | -19.026078 |
| H | -17.205611 | -3.865915 | -18.753617 |
| H | -14.395283 | -0.558816 | -16.991057 |
| H | -13.258008 | -0.342869 | -14.123009 |
| H | -12.198309 | -8.047681 | -21.566936 |
| H | -17.181735 | -4.330361 | -17.015552 |
| H | -11.120602 | -2.355828 | -20.540136 |
| H | -1.984735  | -2.708945 | -31.760848 |
| H | -0.150637  | -8.254570 | -29.527008 |
| H | -1.971900  | -4.488868 | -31.656722 |
| H | -0.195777  | -6.474874 | -29.611509 |
| H | -12.963125 | 0.809767  | -15.448047 |
| H | -13.085704 | -1.545440 | -16.295132 |
| H | -12.140023 | -6.285313 | -21.559133 |
| H | -11.142529 | -4.120795 | -20.574368 |
| H | -11.849729 | -8.120992 | -19.088549 |
| H | -13.522298 | -2.262413 | -21.244067 |
| H | -2.603047  | -8.342073 | -30.212993 |
| H | -1.488583  | -2.568255 | -29.264572 |
| H | -1.476753  | -4.335548 | -29.166624 |
| H | -2.645537  | -6.574773 | -30.293237 |
| H | -5.299658  | -4.219171 | -25.680458 |
| H | -6.453115  | -6.461417 | -26.792856 |
| H | -5.803868  | -4.323193 | -28.157020 |
| H | -10.250902 | -8.125940 | -23.255949 |
| H | -4.030069  | -6.403014 | -26.067502 |

|    |            |           |            |
|----|------------|-----------|------------|
| H  | -9.198323  | -4.109954 | -22.241257 |
| H  | -9.659517  | -4.197480 | -24.722060 |
| H  | -8.356076  | -6.403195 | -25.027668 |
| H  | -4.548475  | -6.523633 | -28.545059 |
| H  | -3.383192  | -4.268678 | -27.417514 |
| H  | -7.250632  | -4.174938 | -23.952215 |
| H  | -10.251487 | -6.357121 | -23.273275 |
| H  | -8.337925  | -8.172545 | -24.979928 |
| H  | -6.436057  | -8.229449 | -26.720703 |
| H  | -7.834972  | -6.332807 | -22.548081 |
| H  | -7.716321  | -4.271145 | -26.432530 |
| H  | -5.314592  | -2.449682 | -25.749582 |
| H  | -9.175780  | -2.341162 | -22.300344 |
| H  | -3.900282  | -4.390898 | -29.891628 |
| H  | -7.822117  | -8.102575 | -22.501709 |
| H  | -9.657539  | -2.429167 | -24.792511 |
| H  | -2.123886  | -6.450471 | -27.819123 |
| H  | -5.932256  | -6.351510 | -24.319810 |
| H  | -7.244673  | -2.405511 | -24.014231 |
| H  | -4.521766  | -8.291352 | -28.463678 |
| H  | -4.009696  | -8.170765 | -25.987595 |
| H  | -5.821325  | -2.555371 | -28.231277 |
| H  | -3.397858  | -2.500921 | -27.499218 |
| H  | -11.607929 | -4.088824 | -23.056434 |
| H  | -9.772004  | -8.111796 | -20.775913 |
| H  | -5.911089  | -8.119596 | -24.242659 |
| H  | -7.732986  | -2.504134 | -26.504928 |
| H  | -3.915192  | -2.623942 | -29.978997 |
| H  | -2.093336  | -8.217634 | -27.737766 |
| H  | -11.585019 | -2.318551 | -23.047003 |
| H  | -9.735204  | -6.341770 | -20.787164 |
| Au | -21.204709 | -2.976326 | -11.687121 |
| Au | -19.202072 | -3.111686 | -13.622238 |
| Au | -21.501006 | -3.423637 | -15.985910 |
| Au | -21.292476 | -5.241299 | -13.627379 |
| Au | -23.264490 | -4.962527 | -11.741510 |
| Au | -23.509817 | -3.286317 | -14.044211 |
| Au | -21.410515 | -1.323794 | -14.026786 |
| Au | -19.332748 | -5.234864 | -15.544429 |

## 2) Glycerol Site

### a) Au<sub>4a</sub>-DMPG

116

|   |           |           |            |
|---|-----------|-----------|------------|
| C | -1.761805 | -3.576678 | -31.286271 |
| C | -2.133899 | -3.486532 | -29.788440 |
| C | -3.657515 | -3.510811 | -29.523211 |
| C | -4.024296 | -3.436135 | -28.022533 |

|    |            |           |            |
|----|------------|-----------|------------|
| C  | -5.547468  | -3.468097 | -27.757704 |
| C  | -5.922239  | -3.402374 | -26.258375 |
| C  | -7.448380  | -3.433888 | -26.006102 |
| C  | -7.830369  | -3.371517 | -24.508969 |
| C  | -9.356596  | -3.387804 | -24.263833 |
| C  | -9.737658  | -3.321423 | -22.767730 |
| C  | -11.264628 | -3.308371 | -22.525248 |
| C  | -11.632873 | -3.263968 | -21.026742 |
| C  | -13.162933 | -3.253915 | -20.788749 |
| C  | -13.518123 | -3.320521 | -19.305863 |
| O  | -12.843516 | -2.823953 | -18.401038 |
| O  | -14.685552 | -4.020834 | -19.114091 |
| C  | -15.075045 | -4.335970 | -17.731850 |
| C  | -14.958995 | -5.867681 | -17.565363 |
| O  | -13.597832 | -6.276473 | -17.910020 |
| C  | -13.431482 | -6.967214 | -19.100604 |
| O  | -14.358276 | -7.373133 | -19.796321 |
| C  | -16.519291 | -3.863126 | -17.498547 |
| O  | -16.637389 | -2.410610 | -17.574589 |
| P  | -16.534454 | -1.514290 | -16.195105 |
| O  | -16.771401 | -0.046948 | -16.538397 |
| O  | -14.891483 | -1.710652 | -15.744826 |
| C  | -13.927423 | -0.710956 | -16.179755 |
| C  | -13.309496 | -0.049427 | -14.928352 |
| O  | -12.392628 | 1.042539  | -15.362059 |
| C  | -14.321052 | 0.631386  | -13.979332 |
| O  | -15.266647 | -0.274055 | -13.357193 |
| O  | -17.301082 | -2.099457 | -15.009677 |
| C  | -11.945133 | -7.146362 | -19.405864 |
| C  | -11.644593 | -7.212152 | -20.924459 |
| C  | -10.128412 | -7.262458 | -21.225834 |
| C  | -9.801973  | -7.305107 | -22.738963 |
| C  | -8.282273  | -7.285984 | -23.034849 |
| C  | -7.938651  | -7.337462 | -24.543289 |
| C  | -6.418292  | -7.306589 | -24.829927 |
| C  | -6.067099  | -7.370275 | -26.335099 |
| C  | -4.545455  | -7.340098 | -26.613358 |
| C  | -4.188657  | -7.409024 | -28.117168 |
| C  | -2.667419  | -7.374184 | -28.394387 |
| C  | -2.311548  | -7.438497 | -29.898100 |
| C  | -0.791299  | -7.385894 | -30.169341 |
| Na | -17.547361 | 0.319299  | -14.334206 |
| H  | -13.773640 | 1.142908  | -13.171288 |
| H  | -0.666913  | -3.553993 | -31.425179 |
| H  | -0.575778  | -7.434417 | -31.250081 |
| H  | -14.386627 | -3.819252 | -17.050227 |
| H  | -15.675158 | -6.403508 | -18.205743 |
| H  | -15.111121 | -6.135855 | -16.509094 |
| H  | -13.654625 | -4.090624 | -21.310229 |
| H  | -11.391557 | -6.326587 | -18.920620 |
| H  | -17.181862 | -4.257490 | -18.284446 |
| H  | -14.424786 | 0.060359  | -16.792462 |



|   |            |           |            |
|---|------------|-----------|------------|
| H | -12.698080 | -0.774954 | -14.363742 |
| H | -12.150335 | -8.091843 | -21.356519 |
| H | -16.868282 | -4.224117 | -16.515970 |
| H | -11.181645 | -2.377732 | -20.549667 |
| H | -2.189962  | -2.733884 | -31.857629 |
| H | -0.270125  | -8.229503 | -29.683120 |
| H | -2.138437  | -4.512322 | -31.736285 |
| H | -0.350197  | -6.450066 | -29.783660 |
| H | -13.153462 | -1.224974 | -16.774560 |
| H | -12.088027 | -6.329351 | -21.418920 |
| H | -11.195194 | -4.141806 | -20.518473 |
| H | -11.617735 | -8.082059 | -18.914608 |
| H | -13.604543 | -2.323078 | -21.190679 |
| H | -2.732507  | -8.365120 | -30.332283 |
| H | -1.707448  | -2.559546 | -29.361436 |
| H | -1.659727  | -4.324810 | -29.245066 |
| H | -2.805531  | -6.599183 | -30.421738 |
| H | -5.449118  | -4.248523 | -25.725479 |
| H | -6.550131  | -6.523451 | -26.857664 |
| H | -5.974007  | -4.389791 | -28.196959 |
| H | -10.252970 | -8.210780 | -23.187384 |
| H | -4.115139  | -6.416863 | -26.180372 |
| H | -9.293444  | -4.185891 | -22.238419 |
| H | -9.789939  | -4.303721 | -24.710209 |
| H | -8.422195  | -6.485345 | -25.057597 |
| H | -4.672194  | -6.565111 | -28.644953 |
| H | -3.544323  | -4.277680 | -27.488796 |
| H | -7.365121  | -4.223748 | -23.978147 |
| H | -10.279924 | -6.441037 | -23.238479 |
| H | -8.374551  | -8.253585 | -24.985403 |
| H | -6.500424  | -8.289729 | -26.772670 |
| H | -7.837891  | -6.373471 | -22.592165 |
| H | -7.871375  | -4.355147 | -26.450599 |
| H | -5.497848  | -2.481479 | -25.814692 |
| H | -9.288564  | -2.416972 | -22.314397 |
| H | -4.088108  | -4.433017 | -29.958324 |
| H | -7.801045  | -8.141407 | -22.522871 |
| H | -9.820023  | -2.534176 | -24.794877 |
| H | -2.239227  | -6.450516 | -27.959544 |
| H | -5.985458  | -6.385719 | -24.395077 |
| H | -7.399512  | -2.455955 | -24.060312 |
| H | -4.617745  | -8.331988 | -28.552616 |
| H | -4.061447  | -8.183562 | -26.084351 |
| H | -6.027618  | -2.624519 | -28.289364 |
| H | -3.597799  | -2.512124 | -27.587630 |
| H | -11.714245 | -4.208975 | -22.985329 |
| H | -9.683080  | -8.146253 | -20.729963 |
| H | -5.930336  | -8.150989 | -24.306793 |
| H | -7.923826  | -2.588528 | -26.540081 |
| H | -4.135009  | -2.667522 | -30.058341 |
| H | -2.178784  | -8.216629 | -27.867533 |
| H | -11.713565 | -2.439752 | -23.044023 |

|    |            |           |            |
|----|------------|-----------|------------|
| H  | -9.636776  | -6.377268 | -20.777875 |
| H  | -11.854251 | 0.708399  | -16.111765 |
| H  | -14.870501 | 1.401068  | -14.561967 |
| H  | -15.277908 | -1.112387 | -13.879918 |
| Au | -14.271991 | 5.501585  | -16.599686 |
| Au | -13.399347 | 3.097540  | -15.946771 |
| Au | -16.004317 | 3.979745  | -15.089010 |
| Au | -18.044819 | 3.234519  | -13.596944 |

b) Au<sub>3</sub>-DMPE

112

|   |            |           |            |
|---|------------|-----------|------------|
| C | -1.569560  | -3.566297 | -31.201871 |
| C | -1.933110  | -3.482214 | -29.701992 |
| C | -3.458014  | -3.479699 | -29.445340 |
| C | -3.838600  | -3.411502 | -27.948278 |
| C | -5.365364  | -3.414502 | -27.702525 |
| C | -5.753218  | -3.357900 | -26.206299 |
| C | -7.282286  | -3.363032 | -25.972312 |
| C | -7.687007  | -3.306695 | -24.480709 |
| C | -9.217907  | -3.294264 | -24.259847 |
| C | -9.625910  | -3.236700 | -22.769145 |
| C | -11.157462 | -3.212578 | -22.552939 |
| C | -11.561925 | -3.222137 | -21.061402 |
| C | -13.097968 | -3.213751 | -20.871304 |
| C | -13.519883 | -3.354888 | -19.409653 |
| O | -12.876409 | -2.949079 | -18.442252 |
| O | -14.731037 | -4.007220 | -19.322985 |
| C | -15.234464 | -4.380289 | -17.991242 |
| C | -15.254661 | -5.923260 | -17.923542 |
| O | -13.894620 | -6.406800 | -18.154239 |
| C | -13.634895 | -6.978411 | -19.388078 |
| O | -14.502791 | -7.274614 | -20.205133 |
| C | -16.642000 | -3.790082 | -17.812147 |
| O | -16.596608 | -2.362244 | -17.495535 |
| P | -16.539754 | -1.937470 | -15.903155 |
| O | -16.938781 | -0.384281 | -16.034772 |
| O | -14.941957 | -1.953622 | -15.482692 |
| C | -13.999074 | -0.982593 | -16.053290 |
| C | -13.708821 | 0.115068  | -15.016766 |
| N | -14.959143 | 0.861364  | -14.633251 |
| O | -17.306436 | -2.844277 | -14.994031 |
| C | -12.131469 | -7.170222 | -19.577468 |
| C | -11.726017 | -7.184776 | -21.069029 |
| C | -10.196061 | -7.221346 | -21.277611 |
| C | -9.803386  | -7.236645 | -22.773329 |
| C | -8.276595  | -7.234017 | -23.016046 |
| C | -7.897326  | -7.270177 | -24.515293 |
| C | -6.372221  | -7.262212 | -24.769276 |
| C | -5.994734  | -7.320820 | -26.268353 |
| C | -4.467996  | -7.314491 | -26.518174 |

|   |            |           |            |
|---|------------|-----------|------------|
| C | -4.085493  | -7.377860 | -28.016002 |
| C | -2.558926  | -7.364363 | -28.267647 |
| C | -2.175645  | -7.425108 | -29.765408 |
| C | -0.649813  | -7.397839 | -30.013437 |
| H | -16.292862 | 0.196639  | -15.483603 |
| H | -14.835248 | 1.883606  | -14.782347 |
| H | -15.157445 | 0.740698  | -13.633888 |
| H | -0.476204  | -3.568146 | -31.350222 |
| H | -0.420561  | -7.441608 | -31.092182 |
| H | -14.547039 | -3.981531 | -17.232758 |
| H | -15.933670 | -6.362815 | -18.668770 |
| H | -15.536231 | -6.246127 | -16.910301 |
| H | -13.574566 | -4.019326 | -21.451864 |
| H | -11.608137 | -6.371774 | -19.026129 |
| H | -17.205558 | -3.866268 | -18.753929 |
| H | -14.395460 | -0.558721 | -16.991038 |
| H | -13.257368 | -0.342804 | -14.123001 |
| H | -12.198367 | -8.047775 | -21.567075 |
| H | -17.180962 | -4.329353 | -17.015727 |
| H | -11.120744 | -2.355846 | -20.540031 |
| H | -1.984814  | -2.708875 | -31.760901 |
| H | -0.150699  | -8.254674 | -29.526998 |
| H | -1.971892  | -4.488930 | -31.656720 |
| H | -0.195932  | -6.474804 | -29.611506 |
| H | -12.962812 | 0.810475  | -15.448220 |
| H | -13.085360 | -1.544944 | -16.294875 |
| H | -12.139886 | -6.285463 | -21.559310 |
| H | -11.142582 | -4.120874 | -20.574467 |
| H | -11.849735 | -8.121261 | -19.088680 |
| H | -13.522433 | -2.262572 | -21.244003 |
| H | -2.603144  | -8.342048 | -30.212982 |
| H | -1.488588  | -2.568322 | -29.264680 |
| H | -1.476865  | -4.335465 | -29.166641 |
| H | -2.645610  | -6.574728 | -30.293295 |
| H | -5.299791  | -4.219151 | -25.680366 |
| H | -6.453135  | -6.461324 | -26.792930 |
| H | -5.804007  | -4.323362 | -28.157046 |
| H | -10.250740 | -8.126102 | -23.256083 |
| H | -4.030036  | -6.403057 | -26.067690 |
| H | -9.198384  | -4.110122 | -22.241338 |
| H | -9.659594  | -4.197683 | -24.722182 |
| H | -8.356160  | -6.403153 | -25.027725 |
| H | -4.548441  | -6.523526 | -28.545155 |
| H | -3.383206  | -4.268817 | -27.417529 |
| H | -7.250549  | -4.175032 | -23.952067 |
| H | -10.251466 | -6.357059 | -23.273382 |
| H | -8.338148  | -8.172688 | -24.979995 |
| H | -6.435974  | -8.229569 | -26.720712 |
| H | -7.834968  | -6.332875 | -22.548252 |
| H | -7.716402  | -4.271283 | -26.432431 |
| H | -5.314799  | -2.449824 | -25.749534 |
| H | -9.175804  | -2.341141 | -22.300236 |

|    |            |           |            |
|----|------------|-----------|------------|
| H  | -3.900443  | -4.391054 | -29.891659 |
| H  | -7.822127  | -8.102606 | -22.501881 |
| H  | -9.657482  | -2.429149 | -24.792541 |
| H  | -2.123883  | -6.450423 | -27.819168 |
| H  | -5.932230  | -6.351435 | -24.319678 |
| H  | -7.244536  | -2.405457 | -24.014328 |
| H  | -4.521696  | -8.291449 | -28.463817 |
| H  | -4.009504  | -8.170886 | -25.987584 |
| H  | -5.821409  | -2.555353 | -28.231232 |
| H  | -3.397826  | -2.500788 | -27.499247 |
| H  | -11.607997 | -4.089102 | -23.056697 |
| H  | -9.771983  | -8.112044 | -20.775931 |
| H  | -5.911028  | -8.119661 | -24.242741 |
| H  | -7.733175  | -2.503900 | -26.504968 |
| H  | -3.915207  | -2.623868 | -29.978976 |
| H  | -2.093250  | -8.217808 | -27.737731 |
| H  | -11.584914 | -2.318697 | -23.047015 |
| H  | -9.735289  | -6.341809 | -20.787317 |
| Au | -14.816699 | 6.087466  | -14.617257 |
| Au | -16.196678 | 3.885075  | -13.632871 |
| Au | -13.547635 | 3.760363  | -15.403010 |

### 3) Carboxylate site

#### a) Au<sub>5b</sub>-DMPG

117

|   |            |           |            |
|---|------------|-----------|------------|
| C | -1.596522  | -3.508246 | -31.143248 |
| C | -1.963661  | -3.429568 | -29.644427 |
| C | -3.488524  | -3.433314 | -29.388282 |
| C | -3.868556  | -3.369303 | -27.890801 |
| C | -5.395408  | -3.379160 | -27.644596 |
| C | -5.781914  | -3.322747 | -26.148445 |
| C | -7.309878  | -3.328446 | -25.912093 |
| C | -7.706170  | -3.272593 | -24.418983 |
| C | -9.235586  | -3.261160 | -24.191442 |
| C | -9.636662  | -3.206443 | -22.699014 |
| C | -11.167142 | -3.177023 | -22.475861 |
| C | -11.561324 | -3.166456 | -20.982448 |
| C | -13.094131 | -3.152013 | -20.771683 |
| C | -13.484023 | -3.304691 | -19.303859 |
| O | -12.799915 | -2.940750 | -18.347801 |
| O | -14.709755 | -3.929470 | -19.192997 |
| C | -15.183240 | -4.265768 | -17.843511 |
| C | -15.086055 | -5.798893 | -17.673238 |
| O | -13.717413 | -6.231158 | -18.028444 |
| C | -13.526332 | -6.847314 | -19.214499 |
| O | -14.483574 | -7.130255 | -19.967738 |

|    |            |           |            |
|----|------------|-----------|------------|
| C  | -16.644466 | -3.802156 | -17.700271 |
| O  | -16.754317 | -2.353706 | -17.684257 |
| P  | -16.693052 | -1.560373 | -16.229006 |
| O  | -17.004033 | -0.083753 | -16.485655 |
| O  | -15.095306 | -1.747603 | -15.754022 |
| C  | -14.110990 | -0.749646 | -16.144902 |
| C  | -13.681198 | 0.102631  | -14.925830 |
| O  | -12.561163 | 0.951439  | -15.291175 |
| C  | -14.745717 | 1.092749  | -14.385819 |
| O  | -15.761532 | 0.467962  | -13.527761 |
| O  | -17.517160 | -2.259066 | -15.141354 |
| C  | -12.053401 | -7.107484 | -19.497659 |
| C  | -11.691738 | -7.114801 | -21.004290 |
| C  | -10.163155 | -7.170271 | -21.241875 |
| C  | -9.790370  | -7.196895 | -22.742805 |
| C  | -8.264223  | -7.202234 | -22.997983 |
| C  | -7.893116  | -7.245775 | -24.500219 |
| C  | -6.368108  | -7.237515 | -24.760477 |
| C  | -5.988462  | -7.288887 | -26.259499 |
| C  | -4.460171  | -7.278028 | -26.507594 |
| C  | -4.086524  | -7.335560 | -28.008256 |
| C  | -2.564241  | -7.321270 | -28.273735 |
| C  | -2.191422  | -7.375316 | -29.773217 |
| C  | -0.665007  | -7.345689 | -30.013681 |
| Na | -17.905067 | -0.088818 | -14.332108 |
| H  | -14.219431 | 1.878587  | -13.816596 |
| H  | -0.502874  | -3.502714 | -31.289643 |
| H  | -0.423391  | -7.386639 | -31.089948 |
| H  | -14.543831 | -3.755904 | -17.111703 |
| H  | -15.813180 | -6.335972 | -18.296423 |
| H  | -15.206119 | -6.069741 | -16.615112 |
| H  | -13.586586 | -3.949791 | -21.350891 |
| H  | -11.478089 | -6.339131 | -18.957830 |
| H  | -17.232940 | -4.138497 | -18.568235 |
| H  | -14.498684 | -0.093715 | -16.941413 |
| H  | -13.390597 | -0.587228 | -14.102190 |
| H  | -12.181769 | -7.973164 | -21.498419 |
| H  | -17.076279 | -4.233750 | -16.779732 |
| H  | -11.113742 | -2.295738 | -20.474763 |
| H  | -2.016389  | -2.652528 | -31.700982 |
| H  | -0.170606  | -8.202757 | -29.522418 |
| H  | -1.991847  | -4.432134 | -31.600757 |
| H  | -0.218309  | -6.422539 | -29.603499 |
| H  | -13.241806 | -1.309152 | -16.531476 |
| H  | -12.101414 | -6.205963 | -21.479694 |
| H  | -11.137602 | -4.058894 | -20.486720 |
| H  | -11.794186 | -8.077625 | -19.033352 |
| H  | -13.525056 | -2.198464 | -21.128852 |
| H  | -2.619206  | -8.290178 | -30.224514 |
| H  | -1.523356  | -2.515502 | -29.204204 |
| H  | -1.504985  | -4.281450 | -29.109715 |
| H  | -2.662072  | -6.523014 | -30.297229 |

|    |            |            |            |
|----|------------|------------|------------|
| H  | -5.327274  | -4.183336  | -25.622405 |
| H  | -6.445725  | -6.427839  | -26.783618 |
| H  | -5.830317  | -4.290171  | -28.098802 |
| H  | -10.242597 | -8.089510  | -23.214631 |
| H  | -4.023211  | -6.366014  | -26.056332 |
| H  | -9.207892  | -4.082676  | -22.175833 |
| H  | -9.679668  | -4.162850  | -24.655732 |
| H  | -8.354039  | -6.380989  | -25.013180 |
| H  | -4.553802  | -6.478555  | -28.528999 |
| H  | -3.408666  | -4.225540  | -27.361961 |
| H  | -7.265165  | -4.139733  | -23.891726 |
| H  | -10.239295 | -6.318283  | -23.243398 |
| H  | -8.338024  | -8.149068  | -24.959437 |
| H  | -6.423387  | -8.198370  | -26.717042 |
| H  | -7.814588  | -6.301111  | -22.538177 |
| H  | -7.745308  | -4.237168  | -26.370254 |
| H  | -5.343649  | -2.414357  | -25.692354 |
| H  | -9.182059  | -2.313066  | -22.230334 |
| H  | -3.928594  | -4.344891  | -29.836459 |
| H  | -7.809606  | -8.071697  | -22.485349 |
| H  | -9.676200  | -2.394255  | -24.719965 |
| H  | -2.124324  | -6.409744  | -27.826597 |
| H  | -5.927820  | -6.329112  | -24.307384 |
| H  | -7.261258  | -2.370797  | -23.956740 |
| H  | -4.526188  | -8.246838  | -28.457173 |
| H  | -3.996648  | -8.135095  | -25.981436 |
| H  | -5.855341  | -2.522040  | -28.173357 |
| H  | -3.431663  | -2.456931  | -27.441157 |
| H  | -11.622223 | -4.057834  | -22.968941 |
| H  | -9.739748  | -8.062464  | -20.742897 |
| H  | -5.905847  | -8.097171  | -24.238994 |
| H  | -7.762586  | -2.468722  | -26.442562 |
| H  | -3.948654  | -2.577445  | -29.919015 |
| H  | -2.092261  | -8.176399  | -27.753260 |
| H  | -11.594043 | -2.288417  | -22.978520 |
| H  | -9.687662  | -6.291319  | -20.765531 |
| H  | -11.904041 | 0.397766   | -15.760350 |
| H  | -15.304180 | 1.546357   | -15.216832 |
| H  | -15.300567 | -0.119639  | -12.895389 |
| Au | -15.073288 | -8.886264  | -21.271749 |
| Au | -17.492104 | -10.182577 | -20.648959 |
| Au | -18.974721 | -9.500714  | -18.536904 |
| Au | -21.142357 | -9.118575  | -17.026633 |
| Au | -15.821667 | -10.911028 | -22.798876 |

b) Au<sub>5c</sub> - DMPE

114

|   |           |           |            |
|---|-----------|-----------|------------|
| C | -1.565663 | -3.572011 | -31.201584 |
| C | -1.939490 | -3.481320 | -29.705039 |

|   |            |           |            |
|---|------------|-----------|------------|
| C | -3.465379  | -3.478252 | -29.454806 |
| C | -3.848814  | -3.405972 | -27.958412 |
| C | -5.376667  | -3.409387 | -27.715642 |
| C | -5.767254  | -3.346336 | -26.219881 |
| C | -7.296913  | -3.349320 | -25.985715 |
| C | -7.697763  | -3.289673 | -24.492490 |
| C | -9.228119  | -3.277786 | -24.264516 |
| C | -9.631089  | -3.224177 | -22.771807 |
| C | -11.162352 | -3.187544 | -22.553683 |
| C | -11.562883 | -3.178161 | -21.061098 |
| C | -13.096293 | -3.141390 | -20.860186 |
| C | -13.506579 | -3.280360 | -19.394329 |
| O | -12.826190 | -2.944842 | -18.425280 |
| O | -14.757492 | -3.854029 | -19.307777 |
| C | -15.253475 | -4.268554 | -17.988378 |
| C | -15.291749 | -5.814213 | -17.972605 |
| O | -13.948588 | -6.327100 | -18.243915 |
| C | -13.684024 | -6.788039 | -19.516857 |
| O | -14.540147 | -6.917983 | -20.392317 |
| C | -16.662385 | -3.689422 | -17.785841 |
| O | -16.630426 | -2.265621 | -17.459559 |
| P | -16.570809 | -1.855707 | -15.863147 |
| O | -16.974101 | -0.304043 | -15.978831 |
| O | -14.971565 | -1.872500 | -15.449680 |
| C | -14.026958 | -0.917911 | -16.045666 |
| C | -13.713174 | 0.198399  | -15.034585 |
| N | -14.944216 | 0.990135  | -14.674125 |
| O | -17.333738 | -2.777630 | -14.967228 |
| C | -12.194851 | -7.088897 | -19.673546 |
| C | -11.750336 | -7.128134 | -21.152627 |
| C | -10.218082 | -7.204646 | -21.331414 |
| C | -9.800139  | -7.229162 | -22.820449 |
| C | -8.268608  | -7.224424 | -23.030286 |
| C | -7.862170  | -7.260563 | -24.521825 |
| C | -6.334281  | -7.248092 | -24.766519 |
| C | -5.966993  | -7.305678 | -26.269768 |
| C | -4.443770  | -7.300728 | -26.536993 |
| C | -4.072666  | -7.366909 | -28.037531 |
| C | -2.546625  | -7.359036 | -28.291009 |
| C | -2.161347  | -7.421743 | -29.788267 |
| C | -0.633979  | -7.400481 | -30.032151 |
| H | -16.313958 | 0.275757  | -15.446345 |
| H | -14.826301 | 1.976383  | -14.928835 |
| H | -15.095761 | 0.963847  | -13.659997 |
| H | -0.471083  | -3.571034 | -31.341341 |
| H | -0.401135  | -7.447120 | -31.110222 |
| H | -14.560235 | -3.901578 | -17.218650 |
| H | -16.001331 | -6.211784 | -18.713396 |
| H | -15.548747 | -6.166798 | -16.962565 |
| H | -13.592000 | -3.943270 | -21.430596 |
| H | -11.638920 | -6.326766 | -19.102452 |
| H | -17.237368 | -3.767330 | -18.721326 |

|   |            |           |            |
|---|------------|-----------|------------|
| H | -14.429764 | -0.508439 | -16.987472 |
| H | -13.283459 | -0.254133 | -14.126169 |
| H | -12.231426 | -7.985149 | -21.653832 |
| H | -17.180010 | -4.242627 | -16.984260 |
| H | -11.101366 | -2.317611 | -20.547755 |
| H | -1.979926  | -2.719605 | -31.768758 |
| H | -0.138803  | -8.258711 | -29.543647 |
| H | -1.960901  | -4.498354 | -31.654423 |
| H | -0.177813  | -6.477815 | -29.631446 |
| H | -12.941239 | 0.856237  | -15.471833 |
| H | -13.118149 | -1.489675 | -16.283455 |
| H | -12.127258 | -6.221918 | -21.658487 |
| H | -11.159791 | -4.081803 | -20.569557 |
| H | -11.991848 | -8.055730 | -19.176116 |
| H | -13.513144 | -2.188555 | -21.237024 |
| H | -2.590346  | -8.337785 | -30.237007 |
| H | -1.497749  | -2.565500 | -29.269082 |
| H | -1.486779  | -4.332177 | -29.163120 |
| H | -2.626131  | -6.569875 | -30.319094 |
| H | -5.314911  | -4.205916 | -25.689925 |
| H | -6.433759  | -6.446327 | -26.787667 |
| H | -5.813875  | -4.321002 | -28.166593 |
| H | -10.238071 | -8.121414 | -23.306897 |
| H | -4.002640  | -6.388389 | -26.091954 |
| H | -9.209859  | -4.104104 | -22.249417 |
| H | -9.671831  | -4.179810 | -24.728409 |
| H | -8.314417  | -6.393609 | -25.040361 |
| H | -4.535426  | -6.511502 | -28.565538 |
| H | -3.394625  | -4.262134 | -27.424335 |
| H | -7.257203  | -4.156250 | -23.963787 |
| H | -10.241159 | -6.354571 | -23.335624 |
| H | -8.293516  | -8.164306 | -24.994462 |
| H | -6.415976  | -8.214437 | -26.714719 |
| H | -7.842254  | -6.320230 | -22.553999 |
| H | -7.730993  | -4.259165 | -26.443171 |
| H | -5.328495  | -2.436911 | -25.766119 |
| H | -9.172706  | -2.334362 | -22.299295 |
| H | -3.908164  | -4.390799 | -29.898623 |
| H | -7.825903  | -8.092741 | -22.505526 |
| H | -9.669451  | -2.410455 | -24.792454 |
| H | -2.108410  | -6.446451 | -27.842677 |
| H | -5.894830  | -6.336342 | -24.317670 |
| H | -7.253548  | -2.386668 | -24.031450 |
| H | -4.513574  | -8.279724 | -28.482548 |
| H | -3.982168  | -8.156639 | -26.008322 |
| H | -5.832748  | -2.552926 | -28.248910 |
| H | -3.409600  | -2.493441 | -27.510936 |
| H | -11.620192 | -4.065502 | -23.048794 |
| H | -9.821525  | -8.104202 | -20.823159 |
| H | -5.867959  | -8.104787 | -24.242342 |
| H | -7.747521  | -2.490782 | -26.520107 |
| H | -3.922051  | -2.623581 | -29.990753 |



|    |            |            |            |
|----|------------|------------|------------|
| H  | -2.084417  | -8.214606  | -27.761280 |
| H  | -11.581904 | -2.295514  | -23.057148 |
| H  | -9.744042  | -6.334929  | -20.836846 |
| Au | -16.170157 | -8.952334  | -21.949632 |
| Au | -14.433364 | -13.193275 | -20.700487 |
| Au | -15.174854 | -11.405994 | -22.702549 |
| Au | -15.613844 | -10.673335 | -19.932999 |
| Au | -14.868484 | -12.473842 | -18.051014 |

Optimized co-ordinates for silver quantum dots

### Phosphate site

a) Ag<sub>5b</sub>-DMPG

117

|   |            |           |            |
|---|------------|-----------|------------|
| C | -1.421095  | -3.366663 | -31.219801 |
| C | -1.798952  | -3.313923 | -29.721864 |
| C | -3.324151  | -3.347430 | -29.464269 |
| C | -3.697079  | -3.301631 | -27.963347 |
| C | -5.221411  | -3.336092 | -27.700502 |
| C | -5.593860  | -3.307217 | -26.197911 |
| C | -7.120252  | -3.345754 | -25.945385 |
| C | -7.516015  | -3.335193 | -24.448336 |
| C | -9.048764  | -3.360949 | -24.231878 |
| C | -9.485780  | -3.349324 | -22.746235 |
| C | -11.025417 | -3.352143 | -22.575802 |
| C | -11.496114 | -3.378953 | -21.102331 |
| C | -13.044270 | -3.373924 | -20.991274 |
| C | -13.544266 | -3.541037 | -19.557272 |
| O | -13.041465 | -3.005842 | -18.566701 |
| O | -14.646293 | -4.365995 | -19.521667 |
| C | -15.171733 | -4.785933 | -18.212345 |
| C | -14.892275 | -6.299067 | -18.048808 |
| O | -13.484511 | -6.573082 | -18.322001 |
| C | -13.205805 | -7.277828 | -19.481409 |
| O | -14.063236 | -7.777362 | -20.205757 |
| C | -16.692217 | -4.550131 | -18.183452 |
| O | -17.074727 | -3.189312 | -17.828023 |
| P | -17.241072 | -2.790273 | -16.229343 |
| O | -18.166150 | -1.581699 | -16.168625 |
| O | -15.700225 | -2.358818 | -15.762343 |
| C | -15.062721 | -1.227018 | -16.450049 |
| C | -14.198112 | -0.457044 | -15.429007 |
| O | -13.239665 | 0.389536  | -16.107986 |
| C | -14.989251 | 0.520656  | -14.528231 |
| O | -16.155035 | -0.079015 | -13.885193 |
| O | -17.537239 | -4.062653 | -15.412646 |
| C | -11.700476 | -7.340187 | -19.720093 |
| C | -11.347146 | -7.333514 | -21.226335 |

|    |            |           |            |
|----|------------|-----------|------------|
| C  | -9.823873  | -7.347002 | -21.478018 |
| C  | -9.461407  | -7.328004 | -22.980764 |
| C  | -7.938504  | -7.302207 | -23.238761 |
| C  | -7.568477  | -7.300601 | -24.738871 |
| C  | -6.044460  | -7.262522 | -24.991322 |
| C  | -5.667499  | -7.286957 | -26.489033 |
| C  | -4.143155  | -7.252396 | -26.738702 |
| C  | -3.769379  | -7.292549 | -28.237268 |
| C  | -2.247126  | -7.246425 | -28.498019 |
| C  | -1.881036  | -7.282056 | -29.999648 |
| C  | -0.360149  | -7.199836 | -30.259463 |
| Na | -18.416653 | -0.026020 | -14.619548 |
| H  | -14.313293 | 0.940040  | -13.762568 |
| H  | -0.325806  | -3.342800 | -31.354264 |
| H  | -0.135568  | -7.232199 | -31.339484 |
| H  | -14.660651 | -4.213519 | -17.427292 |
| H  | -15.515067 | -6.903000 | -18.725183 |
| H  | -15.076290 | -6.583747 | -17.001660 |
| H  | -13.485669 | -4.165972 | -21.615106 |
| H  | -11.222467 | -6.501791 | -19.188537 |
| H  | -17.106191 | -4.723186 | -19.188400 |
| H  | -15.820231 | -0.564688 | -16.900862 |
| H  | -13.682372 | -1.205302 | -14.791493 |
| H  | -11.822992 | -8.200983 | -21.713135 |
| H  | -17.152190 | -5.253536 | -17.470926 |
| H  | -11.086609 | -2.515753 | -20.551513 |
| H  | -1.848755  | -2.510757 | -31.771580 |
| H  | 0.170848   | -8.039412 | -29.776275 |
| H  | -1.795696  | -4.290783 | -31.693942 |
| H  | 0.060512   | -6.261052 | -29.857608 |
| H  | -14.416742 | -1.637675 | -17.242318 |
| H  | -11.790133 | -6.436370 | -21.695634 |
| H  | -11.098330 | -4.281639 | -20.604955 |
| H  | -11.330800 | -8.269449 | -19.248087 |
| H  | -13.441649 | -2.411413 | -21.364028 |
| H  | -2.283646  | -8.209536 | -30.449181 |
| H  | -1.375435  | -2.397637 | -29.269037 |
| H  | -1.326071  | -4.165415 | -29.198323 |
| H  | -2.386674  | -6.443679 | -30.514031 |
| H  | -5.118235  | -4.167185 | -25.689781 |
| H  | -6.140372  | -6.426286 | -26.998059 |
| H  | -5.647751  | -4.246995 | -28.162236 |
| H  | -9.903028  | -8.214344 | -23.474618 |
| H  | -3.718371  | -6.339372 | -26.279617 |
| H  | -9.059968  | -4.232122 | -22.232808 |
| H  | -9.465507  | -4.261208 | -24.723032 |
| H  | -8.041208  | -6.429961 | -25.232057 |
| H  | -4.252422  | -6.441180 | -28.753159 |
| H  | -3.220732  | -4.155525 | -27.445873 |
| H  | -7.057212  | -4.206283 | -23.943252 |
| H  | -9.927836  | -6.444382 | -23.456170 |
| H  | -7.997406  | -8.199829 | -25.221200 |

|    |            |           |            |
|----|------------|-----------|------------|
| H  | -6.092163  | -8.194599 | -26.958769 |
| H  | -7.501794  | -6.408030 | -22.753716 |
| H  | -7.542814  | -4.250006 | -26.424346 |
| H  | -5.167294  | -2.397431 | -25.733428 |
| H  | -9.060266  | -2.460671 | -22.242401 |
| H  | -3.749358  | -4.262945 | -29.918854 |
| H  | -7.471393  | -8.178183 | -22.749128 |
| H  | -9.500630  | -2.492264 | -24.748541 |
| H  | -1.827410  | -6.328976 | -28.042249 |
| H  | -5.621470  | -6.353189 | -24.522860 |
| H  | -7.091696  | -2.435827 | -23.962457 |
| H  | -4.190374  | -8.209206 | -28.693302 |
| H  | -3.668444  | -8.106920 | -26.219766 |
| H  | -5.699793  | -2.479295 | -28.213012 |
| H  | -3.269183  | -2.387476 | -27.508701 |
| H  | -11.442034 | -4.231691 | -23.103726 |
| H  | -9.380566  | -8.244252 | -21.004607 |
| H  | -5.567644  | -8.122200 | -24.482675 |
| H  | -7.592091  | -2.481002 | -26.450263 |
| H  | -3.801754  | -2.495324 | -29.985244 |
| H  | -1.759657  | -8.096841 | -27.982810 |
| H  | -11.449818 | -2.461298 | -23.077748 |
| H  | -9.360096  | -6.473158 | -20.980171 |
| H  | -12.647370 | -0.188224 | -16.631583 |
| H  | -15.370618 | 1.350935  | -15.145273 |
| H  | -15.907637 | -0.983774 | -13.601688 |
| Ag | -18.948109 | -4.232364 | -13.673475 |
| Ag | -20.261433 | -2.273659 | -12.018549 |
| Ag | -20.502768 | 0.507853  | -12.373841 |
| Ag | -20.425659 | -5.086313 | -11.514900 |
| Ag | -19.927943 | 2.774147  | -13.876581 |

b) Ag<sub>4b</sub>-DMPE

113

|   |            |           |            |
|---|------------|-----------|------------|
| C | -1.432474  | -3.825266 | -31.445502 |
| C | -1.796657  | -3.741261 | -29.945764 |
| C | -3.321666  | -3.738964 | -29.688966 |
| C | -3.701658  | -3.670469 | -28.191543 |
| C | -5.228749  | -3.673793 | -27.946098 |
| C | -5.617155  | -3.617019 | -26.450007 |
| C | -7.146336  | -3.621566 | -26.216290 |
| C | -7.550073  | -3.565658 | -24.724100 |
| C | -9.081347  | -3.553344 | -24.503188 |
| C | -9.489096  | -3.495641 | -23.012138 |
| C | -11.020819 | -3.472211 | -22.796692 |
| C | -11.425131 | -3.481035 | -21.305043 |
| C | -12.961084 | -3.473037 | -21.114353 |

|   |            |           |            |
|---|------------|-----------|------------|
| C | -13.382464 | -3.613143 | -19.652837 |
| O | -12.742431 | -3.208224 | -18.682585 |
| O | -14.596028 | -4.262946 | -19.566298 |
| C | -15.096427 | -4.639234 | -18.236353 |
| C | -15.117085 | -6.182937 | -18.167159 |
| O | -13.758130 | -6.664805 | -18.397079 |
| C | -13.498200 | -7.237965 | -19.631959 |
| O | -14.367805 | -7.532796 | -20.447295 |
| C | -16.504640 | -4.054115 | -18.056476 |
| O | -16.467702 | -2.623228 | -17.735020 |
| P | -16.392727 | -2.185810 | -16.157923 |
| O | -16.806540 | -0.643756 | -16.266874 |
| O | -14.808096 | -2.214480 | -15.721221 |
| C | -13.861867 | -1.241265 | -16.294557 |
| C | -13.572893 | -0.141186 | -15.260456 |
| N | -14.825118 | 0.610043  | -14.880528 |
| O | -17.162281 | -3.102062 | -15.245828 |
| C | -11.995033 | -7.429617 | -19.821246 |
| C | -11.589253 | -7.443971 | -21.313027 |
| C | -10.059210 | -7.480681 | -21.521345 |
| C | -9.666583  | -7.495263 | -23.017418 |
| C | -8.139719  | -7.492685 | -23.260262 |
| C | -7.760413  | -7.529289 | -24.759486 |
| C | -6.234805  | -7.520901 | -25.012802 |
| C | -5.857584  | -7.579522 | -26.512026 |
| C | -4.330888  | -7.573878 | -26.761926 |
| C | -3.948911  | -7.636848 | -28.259842 |
| C | -2.422242  | -7.623506 | -28.510917 |
| C | -2.039494  | -7.683993 | -30.008867 |
| C | -0.513651  | -7.657047 | -30.256442 |
| H | -16.154200 | -0.056237 | -15.723419 |
| H | -14.699885 | 1.617435  | -15.025846 |
| H | -15.018632 | 0.485706  | -13.880378 |
| H | -0.338837  | -3.827289 | -31.593699 |
| H | -0.283846  | -7.700729 | -31.335098 |
| H | -14.408712 | -4.242170 | -17.476821 |
| H | -15.796610 | -6.620797 | -18.913427 |
| H | -15.398819 | -6.504140 | -17.152751 |
| H | -13.439645 | -4.278020 | -21.694613 |
| H | -11.472240 | -6.631122 | -19.269430 |
| H | -17.070492 | -4.124607 | -18.996809 |
| H | -14.260294 | -0.820067 | -17.232594 |
| H | -13.121301 | -0.599751 | -14.365779 |
| H | -12.061988 | -8.306794 | -21.811203 |
| H | -17.043966 | -4.591651 | -17.260477 |
| H | -10.984663 | -2.614635 | -20.783237 |
| H | -1.848146  | -2.967979 | -32.004480 |
| H | -0.014722  | -8.514269 | -29.770323 |
| H | -1.834756  | -4.747897 | -31.900012 |
| H | -0.060402  | -6.733519 | -29.854849 |
| H | -12.827772 | 0.549267  | -15.691779 |
| H | -12.950268 | -1.804822 | -16.535936 |

|    |            |           |            |
|----|------------|-----------|------------|
| H  | -12.002279 | -6.544831 | -21.804322 |
| H  | -11.006123 | -4.380034 | -20.818556 |
| H  | -11.713521 | -8.381156 | -19.332922 |
| H  | -13.386767 | -2.522434 | -21.486900 |
| H  | -2.467404  | -8.600857 | -30.456344 |
| H  | -1.351843  | -2.827417 | -29.508741 |
| H  | -1.340719  | -4.594317 | -29.410009 |
| H  | -2.509473  | -6.833555 | -30.537025 |
| H  | -5.164109  | -4.478007 | -25.923186 |
| H  | -6.316240  | -6.719965 | -27.036695 |
| H  | -5.667843  | -4.582746 | -28.400440 |
| H  | -10.112894 | -8.385279 | -23.500261 |
| H  | -3.892912  | -6.662117 | -26.312379 |
| H  | -9.061891  | -4.369861 | -22.485181 |
| H  | -9.523172  | -4.456936 | -24.965951 |
| H  | -8.219441  | -6.662309 | -25.271449 |
| H  | -4.411456  | -6.781995 | -28.789086 |
| H  | -3.246536  | -4.528357 | -27.661109 |
| H  | -7.113382  | -4.433925 | -24.194963 |
| H  | -10.114652 | -6.615463 | -23.517616 |
| H  | -8.202467  | -8.431766 | -25.223639 |
| H  | -6.298653  | -8.488707 | -26.963939 |
| H  | -7.697858  | -6.591643 | -22.792783 |
| H  | -7.580297  | -4.530523 | -26.675361 |
| H  | -5.179237  | -2.709113 | -25.992625 |
| H  | -9.039118  | -2.599837 | -22.542902 |
| H  | -3.764604  | -4.650418 | -30.135037 |
| H  | -7.685569  | -8.361535 | -22.746360 |
| H  | -9.520287  | -2.687925 | -25.036096 |
| H  | -1.987250  | -6.709248 | -28.062955 |
| H  | -5.795344  | -6.610111 | -24.562378 |
| H  | -7.107045  | -2.664243 | -24.258770 |
| H  | -4.384546  | -8.550546 | -28.708167 |
| H  | -3.871775  | -8.430196 | -26.231253 |
| H  | -5.685040  | -2.814419 | -28.474320 |
| H  | -3.260887  | -2.759134 | -27.743047 |
| H  | -11.471180 | -4.348647 | -23.301188 |
| H  | -9.635445  | -8.371735 | -21.019762 |
| H  | -5.773689  | -8.378903 | -24.486732 |
| H  | -7.597430  | -2.761790 | -26.748423 |
| H  | -3.778491  | -2.882690 | -30.222161 |
| H  | -1.956501  | -8.477239 | -27.981359 |
| H  | -11.447536 | -2.578314 | -23.290763 |
| H  | -9.598902  | -6.600641 | -21.031540 |
| Ag | -19.060250 | -3.255591 | -13.609763 |
| Ag | -21.056996 | -4.490970 | -11.951009 |
| Ag | -22.996061 | -3.006757 | -10.373247 |
| Ag | -20.963964 | -1.797956 | -12.027504 |

## **Cartesian coordinates for lowest energy conformers of Au with DMPC, DMPE and DMPG**

### **1) Au4a-Pendate-DMPC-Choline**

|   |           |            |           |
|---|-----------|------------|-----------|
| C | 1.896966  | -2.435856  | -2.842709 |
| N | 1.134400  | -3.454611  | -1.991879 |
| C | 1.431092  | -4.912273  | -2.447590 |
| C | 1.271483  | -5.264549  | -3.932705 |
| O | -0.111612 | -5.285475  | -4.329888 |
| P | -0.622513 | -4.188862  | -5.547799 |
| O | 0.108559  | -4.836624  | -6.907016 |
| C | -0.522988 | -5.990836  | -7.522409 |
| C | 0.067828  | -7.317443  | -7.017395 |
| C | -0.811484 | -8.507607  | -7.457208 |
| O | -0.141567 | -9.755987  | -7.087479 |
| C | 0.348548  | -10.532543 | -8.120907 |
| O | 0.113567  | -10.328257 | -9.309691 |
| C | 1.598418  | -3.341647  | -0.547576 |
| C | -0.364398 | -3.141640  | -2.042394 |
| O | -2.127401 | -4.344407  | -5.588658 |
| O | 0.089990  | -2.865617  | -5.275092 |
| O | 1.398651  | -7.502892  | -7.624637 |
| C | 2.461095  | -7.801017  | -6.810289 |
| O | 2.418439  | -7.831617  | -5.577896 |
| C | 3.708256  | -8.091939  | -7.644336 |
| C | 4.629677  | -9.152646  | -6.994559 |
| C | 5.801562  | -9.554871  | -7.917230 |
| C | 6.738770  | -10.613167 | -7.289178 |
| C | 7.876752  | -11.057467 | -8.237601 |
| C | 8.838926  | -12.093280 | -7.610837 |
| C | 9.965177  | -12.539157 | -8.572239 |
| C | 10.944707 | -13.562456 | -7.951394 |
| C | 12.064870 | -14.003354 | -8.922715 |
| C | 13.052331 | -15.025314 | -8.311954 |
| C | 14.167437 | -15.461740 | -9.290819 |
| C | 15.155869 | -16.488282 | -8.689549 |

C 16.264224 -16.919999 -9.676768  
H 16.950689 -17.650382 -9.214785  
C 1.216096 -11.665031 -7.573931  
C 2.374226 -12.035894 -8.531470  
C 3.325984 -13.093504 -7.930200  
C 4.476173 -13.479809 -8.889430  
C 5.462916 -14.505717 -8.286177  
C 6.590744 -14.921138 -9.259204  
C 7.578871 -15.942979 -8.650745  
C 8.697981 -16.378880 -9.625253  
C 9.683004 -17.400653 -9.010259  
C 10.803401 -17.844347 -9.980007  
C 11.785254 -18.865242 -9.359099  
C 12.911071 -19.308844 -10.322403  
C 13.888531 -20.327227 -9.692537  
H 14.676371 -20.621866 -10.407045  
H 0.175812 -7.303818 -5.925307  
H -0.996495 -8.502261 -8.540918  
H -1.764027 -8.482487 -6.907427  
H 3.391816 -8.403687 -8.652123  
H 1.595125 -11.371492 -6.581994  
H -0.354871 -5.897047 -8.607371  
H 1.875736 -4.603151 -4.574405  
H 0.764609 -5.548880 -1.844990  
H 1.956136 -12.397950 -9.485376  
H -1.607014 -5.974856 -7.317849  
H 5.012578 -8.768919 -6.033701  
H 16.864619 -16.052837 -10.005053  
H 13.358951 -21.243506 -9.376332  
H 15.832096 -17.388690 -10.578586  
H 14.384738 -19.902898 -8.801798  
H 2.475736 -5.102582 -2.152932

H 1.679220 -6.285264 -4.040060  
H 2.948313 -11.123561 -8.774143  
H 4.032145 -10.049577 -6.751649  
H 0.558635 -12.540434 -7.418216  
H 4.253500 -7.137053 -7.764892  
H 12.458833 -19.746686 -11.232252  
H 15.618739 -16.058196 -7.781291  
H 14.593287 -17.380968 -8.358564  
H 13.475212 -18.417382 -10.654340  
H 10.378460 -14.453162 -7.619536  
H 9.259723 -15.485577 -9.958076  
H 11.606149 -14.440615 -9.830243  
H 4.047604 -13.889194 -9.823894  
H 10.140937 -16.962747 -8.102505  
H 6.142826 -11.498689 -6.997051  
H 7.433836 -11.483416 -9.158429  
H 7.147748 -14.019847 -9.578574  
H 11.368290 -16.953880 -10.315497  
H 12.491359 -15.918827 -7.978330  
H 8.260259 -12.980239 -7.290090  
H 5.031208 -12.566696 -9.177158  
H 6.141126 -15.348765 -10.175843  
H 8.240411 -16.814191 -10.534359  
H 5.911680 -14.082220 -7.366830  
H 9.511847 -12.976216 -9.482588  
H 11.399873 -13.126732 -7.041151  
H 7.174310 -10.209440 -6.355085  
H 13.705428 -15.893895 -10.199465  
H 4.903796 -15.407607 -7.970656  
H 8.454669 -10.168288 -8.555451  
H 12.238976 -18.427242 -8.448992  
H 8.036723 -15.508712 -7.741144



|    |           |            |            |
|----|-----------|------------|------------|
| H  | 9.287587  | -11.666300 | -6.693193  |
| H  | 10.347413 | -18.282712 | -10.888614 |
| H  | 9.119454  | -18.291894 | -8.672880  |
| H  | 12.626645 | -13.110908 | -9.260041  |
| H  | 13.513055 | -14.591142 | -7.403630  |
| H  | 5.395448  | -9.951297  | -8.867688  |
| H  | 2.751010  | -14.001200 | -7.663357  |
| H  | 7.017759  | -16.837295 | -8.317445  |
| H  | 10.531799 | -11.648663 | -8.906579  |
| H  | 14.729743 | -14.568510 | -9.626084  |
| H  | 11.221106 | -19.757132 | -9.023687  |
| H  | 6.390188  | -8.655725  | -8.183096  |
| H  | 3.753814  | -12.707628 | -6.984407  |
| H  | -0.676091 | -3.069808  | -3.089761  |
| H  | 2.683117  | -3.509218  | -0.504453  |
| H  | -0.910889 | -3.944746  | -1.529051  |
| H  | 1.377380  | -2.331861  | -0.175918  |
| H  | 1.071153  | -4.093754  | 0.057948   |
| H  | 2.962258  | -2.705704  | -2.840198  |
| H  | 1.775722  | -1.447544  | -2.375598  |
| H  | -0.528418 | -2.180767  | -1.533120  |
| H  | 1.465280  | -2.437549  | -3.857804  |
| Au | 3.927590  | -0.193650  | 1.431476   |
| Au | 2.686442  | 1.415049   | -0.308767  |
| Au | 4.804163  | -0.184953  | -1.219598  |
| Au | 6.601583  | -1.292452  | -2.740364  |

## 2) Au5b-Pendate-DMPE-Carboxylate

|   |           |           |            |
|---|-----------|-----------|------------|
| C | -1.565499 | -3.531799 | -31.170326 |
| C | -1.940388 | -3.442516 | -29.672954 |
| C | -3.467090 | -3.441086 | -29.422058 |
| C | -3.851150 | -3.371999 | -27.925093 |
| C | -5.378589 | -3.378581 | -27.680408 |

C -5.769130 -3.318399 -26.185192  
C -7.297717 -3.323075 -25.949964  
C -7.695514 -3.266251 -24.456666  
C -9.225201 -3.258407 -24.228801  
C -9.628601 -3.211744 -22.736574  
C -11.159554 -3.179460 -22.515328  
C -11.553131 -3.170219 -21.021382  
C -13.084994 -3.140973 -20.810600  
C -13.484753 -3.281068 -19.343271  
O -12.796413 -2.949936 -18.379105  
O -14.735914 -3.856253 -19.242948  
C -15.212938 -4.246972 -17.909066  
C -15.200593 -5.788361 -17.841714  
O -13.829460 -6.257862 -18.139709  
C -13.583504 -6.771063 -19.363167  
O -14.491820 -6.919071 -20.212439  
C -16.637016 -3.699268 -17.709832  
O -16.624992 -2.276237 -17.385077  
P -16.552228 -1.873374 -15.783203  
O -16.965674 -0.325385 -15.887955  
O -14.944271 -1.883331 -15.395250  
C -14.015031 -0.916053 -15.992572  
C -13.706197 0.200923 -14.980956  
N -14.938757 0.989358 -14.618550  
O -17.292860 -2.807308 -14.881665  
C -12.111753 -7.088751 -19.579633  
C -11.700700 -7.105123 -21.070088  
C -10.170521 -7.182385 -21.274231  
C -9.778793 -7.204566 -22.770526  
C -8.250496 -7.200596 -23.002840  
C -7.859356 -7.237242 -24.497602  
C -6.333567 -7.224741 -24.744272

C -5.964332 -7.278903 -26.244991  
C -4.441037 -7.270479 -26.510107  
C -4.069636 -7.332582 -28.011134  
C -2.543752 -7.323012 -28.266322  
C -2.161117 -7.382559 -29.763824  
C -0.634713 -7.361108 -30.008812  
H -16.302886 0.259108 -15.360172  
H -14.840229 1.969094 -14.905580  
H -15.072798 0.991910 -13.601468  
H -0.470423 -3.528557 -31.309447  
H -0.403405 -7.406315 -31.087116  
H -14.530413 -3.834069 -17.153868  
H -15.908499 -6.247516 -18.543890  
H -15.402142 -6.121508 -16.814871  
H -13.583374 -3.940612 -21.382195  
H -11.527121 -6.343805 -19.016500  
H -17.212696 -3.790609 -18.642738  
H -14.428511 -0.509015 -16.930498  
H -13.278590 -0.251958 -14.072334  
H -12.185987 -7.956578 -21.581251  
H -17.146972 -4.260421 -16.909621  
H -11.094876 -2.306668 -20.511637  
H -1.981246 -2.679461 -31.736958  
H -0.140958 -8.220511 -29.520901  
H -1.958639 -4.459079 -31.623443  
H -0.179497 -6.438821 -29.605838  
H -12.934699 0.860545 -15.415819  
H -13.100902 -1.477249 -16.236001  
H -12.083425 -6.191847 -21.557751  
H -11.138606 -4.068495 -20.529279  
H -11.909468 -8.066308 -19.105986  
H -13.508731 -2.187971 -21.177448

H -2.592860 -8.296915 -30.212365  
H -1.499134 -2.526276 -29.237112  
H -1.485795 -4.293017 -29.131679  
H -2.628024 -6.529607 -30.290139  
H -5.316028 -4.177957 -25.656365  
H -6.429579 -6.418909 -26.762413  
H -5.813588 -4.289950 -28.133120  
H -10.222141 -8.099148 -23.248107  
H -3.998683 -6.358484 -26.065397  
H -9.205353 -4.092426 -22.216696  
H -9.667786 -4.158864 -24.696033  
H -8.317543 -6.373160 -25.014341  
H -4.531672 -6.476445 -28.538190  
H -3.393378 -4.228145 -27.394379  
H -7.253181 -4.132095 -23.928662  
H -10.226701 -6.327131 -23.274837  
H -8.294463 -8.140503 -24.965214  
H -6.408603 -8.187707 -26.694008  
H -7.813528 -6.298636 -22.532872  
H -7.733092 -4.231962 -26.407323  
H -5.332104 -2.409509 -25.729376  
H -9.172585 -2.322867 -22.260686  
H -3.907366 -4.353018 -29.869270  
H -7.800909 -8.069287 -22.485373  
H -9.667985 -2.390211 -24.753252  
H -2.105797 -6.411486 -27.816042  
H -5.897316 -6.314444 -24.290606  
H -7.253409 -2.363165 -23.994129  
H -4.509004 -8.244262 -28.459428  
H -3.975125 -8.126734 -25.985744  
H -5.835874 -2.522518 -28.212423  
H -3.411603 -2.459743 -27.477643

H -11.617200 -4.058499 -23.009056  
H -9.766900 -8.082600 -20.773288  
H -5.870942 -8.082759 -24.220249  
H -7.751101 -2.464264 -26.480973  
H -3.922669 -2.585833 -29.957796  
H -2.080589 -8.178668 -27.738266  
H -11.584406 -2.289205 -23.016806  
H -9.692928 -6.312671 -20.783487  
Au -14.979171 -8.781242 -21.421764  
Au -17.137645 -10.256777 -20.365752  
Au -18.452542 -9.388455 -18.208352  
Au -20.233740 -9.315279 -16.222942  
Au -15.613030 -11.050940 -22.613584

### 3) Au7a-Planar-DMPG-Phosphate

C -1.591652 -3.548492 -31.188949  
C -1.954585 -3.477411 -29.688205  
C -3.479036 -3.478092 -29.427522  
C -3.853220 -3.415530 -27.928433  
C -5.378756 -3.422235 -27.674800  
C -5.758622 -3.363809 -26.176818  
C -7.285571 -3.368079 -25.933033  
C -7.678090 -3.313567 -24.438312  
C -9.207705 -3.301397 -24.211191  
C -9.614766 -3.260583 -22.719996  
C -11.146829 -3.226745 -22.507936  
C -11.554060 -3.242462 -21.017814  
C -13.089827 -3.221041 -20.824872  
C -13.502531 -3.388020 -19.365105  
O -12.841457 -3.014351 -18.396119  
O -14.723555 -4.022714 -19.279301  
C -15.210402 -4.395994 -17.945719

C -15.124967 -5.933835 -17.825218  
O -13.754426 -6.352526 -18.103138  
C -13.534184 -7.019324 -19.298827  
O -14.430579 -7.406190 -20.043728  
C -16.664976 -3.922808 -17.808089  
O -16.778901 -2.469354 -17.733753  
P -16.659089 -1.698927 -16.284036  
O -17.034990 -0.234521 -16.477701  
O -15.073832 -1.877914 -15.832986  
C -14.071023 -0.893359 -16.227194  
C -13.638048 -0.034046 -15.017519  
O -12.486769 0.765240 -15.390830  
C -14.680075 1.004361 -14.523213  
O -15.694743 0.450167 -13.618890  
O -17.415804 -2.451139 -15.166705  
C -12.036612 -7.193074 -19.544242  
C -11.678701 -7.196001 -21.050576  
C -10.154546 -7.242865 -21.298672  
C -9.787390 -7.245870 -22.801257  
C -8.262992 -7.246610 -23.060199  
C -7.892466 -7.280378 -24.561271  
C -6.367309 -7.273948 -24.817831  
C -5.991314 -7.328990 -26.317175  
C -4.465185 -7.322062 -26.568763  
C -4.084565 -7.381613 -28.066691  
C -2.558282 -7.371752 -28.315330  
C -2.172714 -7.425369 -29.812169  
C -0.645720 -7.406157 -30.051559  
Na -17.856628 -0.175017 -14.293552  
H -14.133565 1.814432 -14.010217  
H -0.498087 -3.544981 -31.337473  
H -0.408606 -7.446465 -31.128741

H -14.573246 -3.916405 -17.191881  
H -15.809729 -6.438188 -18.522603  
H -15.343872 -6.234823 -16.788926  
H -13.579334 -4.008679 -21.419351  
H -11.498031 -6.397528 -19.004739  
H -17.244938 -4.216765 -18.696890  
H -14.438954 -0.246458 -17.039739  
H -13.385156 -0.712639 -14.175466  
H -12.172668 -8.051699 -21.540108  
H -17.120927 -4.380610 -16.911190  
H -11.106141 -2.383727 -20.489847  
H -2.010540 -2.688227 -31.740838  
H -0.155634 -8.268309 -29.565004  
H -1.990343 -4.468965 -31.650874  
H -0.190761 -6.486986 -29.641677  
H -13.215050 -1.477298 -16.602747  
H -12.098195 -6.288889 -21.521376  
H -11.142655 -4.147717 -20.536511  
H -11.735005 -8.150269 -19.079324  
H -13.506201 -2.258024 -21.175344  
H -2.605184 -8.336647 -30.266504  
H -1.510247 -2.566602 -29.244300  
H -1.496766 -4.334312 -29.160017  
H -2.635839 -6.568650 -30.336033  
H -5.303262 -4.224217 -25.651136  
H -6.450742 -6.468721 -26.839652  
H -5.818111 -4.332704 -28.125375  
H -10.242594 -8.130290 -23.285875  
H -4.026783 -6.411119 -26.118005  
H -9.195987 -4.145365 -22.203899  
H -9.652507 -4.198559 -24.683053  
H -8.351187 -6.411307 -25.069844

|    |            |           |            |
|----|------------|-----------|------------|
| H  | -4.544374  | -6.523660 | -28.592871 |
| H  | -3.393459  | -4.273707 | -27.402583 |
| H  | -7.238179  | -4.182236 | -23.912697 |
| H  | -10.238500 | -6.360096 | -23.287500 |
| H  | -8.337131  | -8.181061 | -25.026184 |
| H  | -6.432111  | -8.237521 | -26.770357 |
| H  | -7.814380  | -6.348187 | -22.594155 |
| H  | -7.724434  | -4.275813 | -26.389676 |
| H  | -5.318769  | -2.455156 | -25.722787 |
| H  | -9.158962  | -2.375116 | -22.237378 |
| H  | -3.922540  | -4.388037 | -29.875766 |
| H  | -7.806582  | -8.117952 | -22.552528 |
| H  | -9.646857  | -2.429360 | -24.732717 |
| H  | -2.121065  | -6.461653 | -27.861065 |
| H  | -5.925990  | -6.365386 | -24.364955 |
| H  | -7.232820  | -2.412506 | -23.974484 |
| H  | -4.522435  | -8.292412 | -28.518569 |
| H  | -4.004722  | -8.179135 | -26.040665 |
| H  | -5.840291  | -2.564939 | -28.201634 |
| H  | -3.412276  | -2.504786 | -27.479229 |
| H  | -11.602319 | -4.096401 | -23.019484 |
| H  | -9.727759  | -8.142265 | -20.814812 |
| H  | -5.906296  | -8.133928 | -24.294963 |
| H  | -7.741117  | -2.507609 | -26.459836 |
| H  | -3.938796  | -2.620152 | -29.955441 |
| H  | -2.096428  | -8.229971 | -27.789760 |
| H  | -11.565523 | -2.326435 | -22.997026 |
| H  | -9.676898  | -6.372021 | -20.809435 |
| H  | -11.845229 | 0.178103  | -15.840189 |
| H  | -15.245825 | 1.418168  | -15.369576 |
| H  | -15.240184 | 0.119780  | -12.818481 |
| Au | -19.806387 | -6.021507 | -12.458499 |



Au -17.849701 -5.749363 -14.311350  
Au -19.132788 -3.343772 -13.801707  
Au -20.651934 -1.121283 -13.181488  
Au -21.136122 -3.512728 -11.893046  
Au -23.168631 -3.552241 -10.030179  
Au -21.806132 -5.921887 -10.600287
